# Supplementary material
Source: Research Square preprint supplement (doi:10.21203/rs.3.rs-10209646/v1)
Supplement: Supplementary file 1 [file 78bcaf17c39eb35ca8a26c2b.doc]

**Table S1 The primer sequences of EuKNOXs genes**

| Gene name | Forward primer（5'-3'） | Reverse primer（3'-5'） |
| --- | --- | --- |
| *EuKNOX1* | CAACTCAAGGCGGAGATAGC | TCTGGTGGTGTGAGGCATAA |
| *EuKNOX2* | ACAAGTGGCCATATCCTTCG | CCAACACATGGTTCATGTCC |
| *EuKNOX3* | AGCCAAAATCATGGCTCATC | GATCAAGTTCCGGGTCCTTT |
| *EuKNOX4* | CGCATCCTCTCTCTCCTCAC | CGCATCCTCTCTCTCCTCAC |
| *EuKNOX5* | AGGTCGATTCTGCAGAGGAA | GTACCTCGCATTTTGCCAAT |
| *EuKNOX6* | AGACGAAATCCAGCGAGAAA | AGACGAAATCCAGCGAGAAA |
| *EuKNOX7* | GATATTGGCGCATCCTTTGT | GATATTGGCGCATCCTTTGT |
| *EuKNOX8* | GCAACAGCTCTTCCAGTTCC | GAACGGTCCACCAATCAATC |
| *UBC* | AGTGGGTGGTGCTGTAGTCC | AACTCCCGTTTCGTTTGTTG |

**Table S2 Secondary structures analysis of *E. ulmoides* KNOX gene family**

| Gene name | Alpha helix | | Extended strand | | Beta turn | | Random coil | |
| --- | --- | --- | --- | --- | --- | --- | --- | --- |
| Number | Percentage/% | Number | Percentage/% | Number | Percentage/% | Number | Percentage/% |
| *EuKNOX1* | 166 | 57.64 | 22 | 7.64 | 19 | 6.60 | 81 | 28.12 |
| *EuKNOX2* | 138 | 41.44 | 38 | 11.41 | 26 | 7.81 | 131 | 39.34 |
| *EuKNOX3* | 105 | 47.95 | 18 | 8.22 | 14 | 6.39 | 82 | 37.44 |
| *EuKNOX4* | 169 | 57.68 | 20 | 6.83 | 22 | 7.51 | 82 | 27.99 |
| *EuKNOX5* | 214 | 50.23 | 33 | 7.75 | 27 | 6.34 | 152 | 35.68 |
| *EuKNOX6* | 161 | 51.94 | 21 | 6.77 | 34 | 10.97 | 94 | 30.32 |
| *EuKNOX7* | 197 | 49.37 | 34 | 8.52 | 19 | 4.76 | 149 | 37.34 |
| *EuKNOX8* | 80 | 37.74 | 26 | 12.26 | 21 | 9.91 | 85 | 40.09 |

***Table S3 The phosphorylation sites, and signal peptides of KNOX proteins in E. ulmoides***

| Protein name | Phosphorylation sites | Serine (S) | Threonine (T) | Tyrosine(Y) | Signal peptides value |
| --- | --- | --- | --- | --- | --- |
| EuKNOX1 | 9 | 8 | 0 | 1 |  |
| EuKNOX2 | 37 | 26 | 2 | 9 |  |
| EuKNOX3 | 26 | 15 | 7 | 4 |  |
| EuKNOX4 | 13 | 8 | 3 | 2 |  |
| EuKNOX5 | 23 | 17 | 4 | 2 |  |
| EuKNOX6 | 28 | 17 | 6 | 5 |  |
| EuKNOX7 | 32 | 24 | 5 | 3 |  |
| EuKNOX8 | 32 | 22 | 7 | 3 |  |

**Table S4 Expression patterns of** ***E. ulmoides*** **KNOX gene family in different tissues**

| Gene name | L-1 | L-2 | L-3 | S-1 | S-2 | S-3 | E-1 | E-2 | E-3 | C-1 | C-2 | C-3 | X-1 | X-2 | X-3 |
| --- | --- | --- | --- | --- | --- | --- | --- | --- | --- | --- | --- | --- | --- | --- | --- |
| *EuKNOX1* | 4.39 | 4.09 | 3.20 | 0.41 | 0.31 | 0 | 0.32 | 0.30 | 0.07 | 0.53 | 0.48 | 0.17 | 5.92 | 5.17 | 5.09 |
| *EuKNOX2* | 0 | 0 | 0 | 3.97 | 3.41 | 3.26 | 5.27 | 5.15 | 4.36 | 3.10 | 3.60 | 3.07 | 7.22 | 7.28 | 7.51 |
| *EuKNOX3* | 0.84 | 0.71 | 0.18 | 2.87 | 2.47 | 2.34 | 0.11 | 0 | 0 | 2.81 | 2.29 | 1.78 | 6.80 | 6.70 | 6.31 |
| *EuKNOX4* | 5.95 | 5.61 | 5.60 | 6.13 | 5.97 | 5.96 | 7.70 | 7.69 | 7.65 | 7.38 | 6.82 | 6.76 | 5.76 | 5.48 | 5.17 |
| *EuKNOX5* | 7.49 | 7.37 | 7.26 | 3.84 | 3.44 | 3.32 | 8.15 | 8.13 | 8.11 | 8.19 | 8.10 | 8.08 | 4.16 | 2.48 | 1.75 |
| *EuKNOX6* | 0.30 | 0.08 | 0.10 | 0.89 | 0.78 | 0.44 | 2.21 | 1.75 | 1.44 | 2.11 | 1.54 | 1.32 | 4.88 | 4.72 | 4.66 |
| *EuKNOX7* | 5.24 | 5.18 | 5.14 | 2.25 | 2.23 | 2.06 | 5.91 | 5.79 | 5.76 | 5.59 | 5.51 | 5.45 | 3.47 | 3.70 | 3.12 |
| *EuKNOX8* | 0.23 | 0.06 | 0.02 | 0.85 | 0.73 | 0.36 | 3.69 | 2.37 | 1.66 | 3.42 | 1.9 | 1.51 | 28.42 | 25.88 | 24.31 |

**Table S5 The FPKM of *E.ulmoide* EuKNOX genes in leaves at different growth stages.**

| Gene name | T01 | T02 | T03 | T04 | T05 | T06 | T07 | T08 | T09 | T10 | T11 | T12 |
| --- | --- | --- | --- | --- | --- | --- | --- | --- | --- | --- | --- | --- |
| *EuKNOX1* | 8.42 | 8.23 | 10.21 | 2.77 | 2.33 | 1.63 | 2.62 | 3.11 | 2.72 | 0 | 0.22 | 0.51 |
| *EuKNOX2* | 69.21 | 68.08 | 62.5 | 1.16 | 1.05 | 1.02 | 0 | 0.05 | 0 | 0 | 0 | 0 |
| *EuKNOX3* | 39.41 | 45.53 | 42.97 | 5.36 | 3.64 | 3.63 | 0.12 | 0.47 | 0.32 | 0 | 0 | 0 |
| *EuKNOX4* | 52.84 | 42.12 | 47.33 | 54.98 | 49.65 | 42.94 | 43.30 | 44.80 | 39.90 | 110.18 | 114.92 | 121.65 |
| *EuKNOX5* | 250.81 | 239.31 | 246.09 | 164.14 | 149.76 | 134.89 | 176.95 | 200.62 | 193.18 | 330.02 | 352.15 | 351.61 |
| *EuKNOX6* | 23.54 | 23.03 | 22.43 | 2.24 | 1.89 | 2.15 | 0.11 | 0 | 0 | 0 | 0 | 0 |
| *EuKNOX7* | 0.08 | 0.30 | 0.22 | 0.09 | 0.07 | 0.15 | 0.16 | 0.21 | 0.17 | 0.90 | 0.54 | 0.59 |
| *EuKNOX8* | 5.26 | 6.95 | 5.05 | 1.45 | 2.37 | 2.15 | 0.38 | 0.09 | 0.07 | 0.26 | 0.56 | 0.46 |

**Table S6 The FPKM of *E.ulmoide EuKNOX* genes in different stages of female flower development**

| Gene name | F-1-1 | F-1-2 | F-1-3 | F-2-1 | F-2-2 | F-2-3 | F-3-1 | F-3-2 | F-3-3 |
| --- | --- | --- | --- | --- | --- | --- | --- | --- | --- |
| *EuKNOX1* | 4.91 | 4.11 | 3.92 | 5.68 | 5.57 | 5.56 | 2.67 | 2.26 | 2.22 |
| *EuKNOX2* | 6.47 | 6.21 | 5.00 | 5.36 | 5.08 | 5.04 | 3.99 | 3.78 | 3.62 |
| *EuKNOX3* | 5.14 | 5.45 | 4.97 | 5.91 | 5.41 | 5.10 | 3.85 | 3.54 | 2.87 |
| *EuKNOX4* | 6.61 | 6.31 | 6.09 | 6.59 | 6.40 | 5.86 | 5.45 | 5.33 | 5.03 |
| *EuKNOX5* | 8.06 | 8.04 | 7.95 | 8.18 | 8.08 | 7.71 | 5.91 | 5.81 | 5.45 |
| *EuKNOX6* | 4.77 | 4.57 | 4.23 | 4.64 | 4.42 | 4.28 | 3.86 | 3.36 | 3.23 |
| *EuKNOX7* | 5.84 | 5.81 | 5.47 | 6.19 | 6.11 | 5.91 | 4.41 | 4.29 | 4.14 |
| *EuKNOX8* | 26.45 | 22.76 | 17.92 | 23.95 | 20.39 | 18.52 | 13.74 | 9.25 | 8.43 |

**Table S7 The FPKM of *E.ulmoide EuKNOX* genes in different stages of male flower development**

| Gene name | M-1-1 | M-1-2 | M-1-3 | M-2-1 | M-2-2 | M-2-3 | M-3-1 | M-3-2 | M-3-3 |
| --- | --- | --- | --- | --- | --- | --- | --- | --- | --- |
| *EuKNOX1* | 4.16 | 3.97 | 3.73 | 4.51 | 4.51 | 3.21 | 1.48 | 1.42 | 1.27 |
| *EuKNOX2* | 6.01 | 5.37 | 4.98 | 6.39 | 5.73 | 5.16 | 4.64 | 2.97 | 2.63 |
| *EuKNOX3* | 5.47 | 4.75 | 4.58 | 5.52 | 5.19 | 4.84 | 4.52 | 3.05 | 2.74 |
| *EuKNOX4* | 6.52 | 6.07 | 5.73 | 5.73 | 5.71 | 5.06 | 5.41 | 5.48 | 5.34 |
| *EuKNOX5* | 8.05 | 7.81 | 7.63 | 7.48 | 7.41 | 6.75 | 5.68 | 5.40 | 4.79 |
| *EuKNOX6* | 4.96 | 4.58 | 4.21 | 5.14 | 4.98 | 4.52 | 3.72 | 3.24 | 3.11 |
| *EuKNOX7* | 5.18 | 5.54 | 5.47 | 6.02 | 5.94 | 4.94 | 4.65 | 4.23 | 3.40 |
| *EuKNOX8* | 30.35 | 22.95 | 17.74 | 34.32 | 30.61 | 22.44 | 12.42 | 8.46 | 7.64 |

**Table S8 The FPKM of *E.ulmoide EuKNOX* genes in leaves of different gutta percha**

| Gene name | L-1 | L-2 | L-3 | H-1 | H-2 | H-3 |
| --- | --- | --- | --- | --- | --- | --- |
| *EuKNOX1* | 0.34 | 0 | 0 | 0 | 0 | 0 |
| *EuKNOX2* | 0 | 0 | 0.10 | 0 | 0 | 0 |
| *EuKNOX3* | 0.45 | 1.24 | 0.18 | 0 | 0 | 0.06 |
| *EuKNOX4* | 120.22 | 109.91 | 103.71 | 110.35 | 117.01 | 113.45 |
| *EuKNOX5* | 392.65 | 477.64 | 449.63 | 441.03 | 524.10 | 495.53 |
| *EuKNOX6* | 0 | 0 | 0.13 | 0 | 0.06 | 0.41 |
| *EuKNOX7* | 0.33 | 0.31 | 0.23 | 0.19 | 0.4106 | 0.45 |
| *EuKNOX8* | 3.03 | 4.08 | 4.75 | 5.39 | 7.1353 | 6.01 |

**Table S9 The FPKM of *E.ulmoide EuKNOX* genes in leaves of different leaf color**

| Gene name | Green leaf-1 | Green leaf-2 | Green leaf-3 | Red leaf-1 | Red leaf-2 | Red leaf-3 |
| --- | --- | --- | --- | --- | --- | --- |
| *EuKNOX1* | 2.4 | 1.86 | 1.32 | 2.84 | 1.965 | 1.09 |
| *EuKNOX2* | 0 | 0 | 0 | 0 | 0 | 0 |
| *EuKNOX3* | 0.47 | 0.235 | 0 | 0.51 | 0.3 | 0.09 |
| *EuKNOX4* | 80.67 | 74.215 | 67.76 | 67.6 | 58.32 | 49.04 |
| *EuKNOX5* | 93.56 | 90.77 | 87.98 | 100.53 | 89.275 | 78.02 |
| *EuKNOX6* | 0 | 0 | 0 | 0 | 0 | 0 |
| *EuKNOX7* | 40.76 | 39.55 | 38.34 | 49.53 | 45.39 | 41.25 |
| *EuKNOX8* | 0.44 | 0.22 | 0 | 0.54 | 0.32 | 0.1 |
